# Supplementary material
Source: publisher figshare collection journal article supplement (https://gsapubs.figshare.com/ndownloader/files/22759364)
Supplement: Supplementary file 1 [file 22759364]

# Large variations of oxygen isotopes in precipitation over south-central Tibet during Marine Isotope Stage 5

By Yanjun Cai et al., 2009

## Supplementary Figures

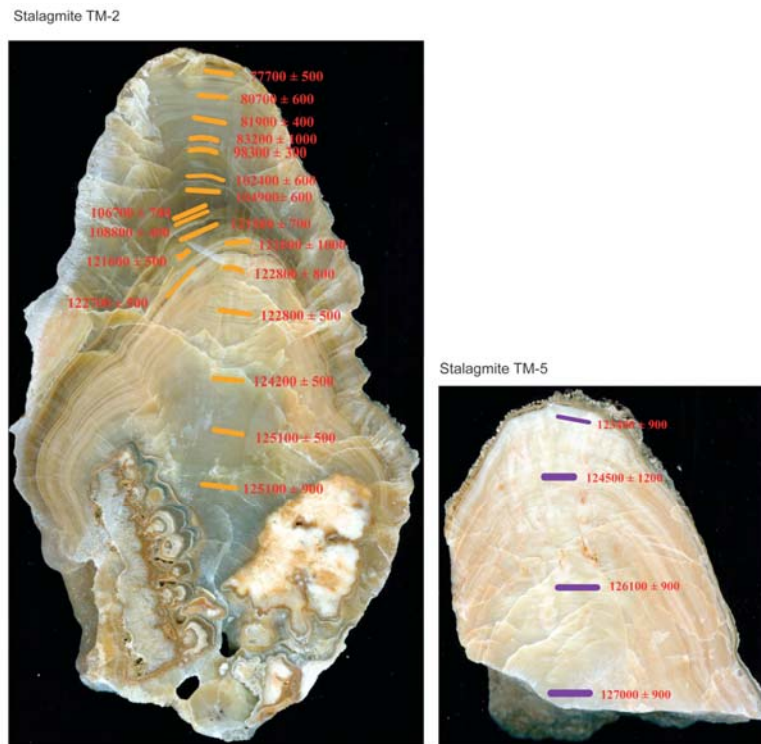

**Figure DR1.** Images of stalagmites TM-2 (left) and TM-5 (right) that were used to establish the Tianmen  $\delta^{18}\text{O}$  record.  $^{230}\text{Th}$  dating positions and results are indicated by color bars and numbers beside the bar.

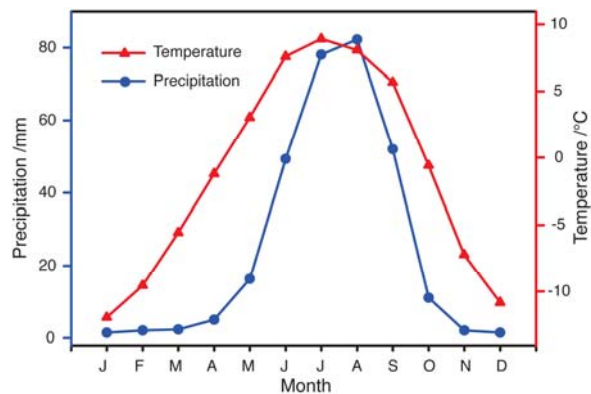

**Figure DR2.** Monthly mean precipitation (blue) and temperature (red) records over 44 years (1957-2000) at the Bange meteorological observatory (31°23'N, 90°01'E, elevation 4800 m). The summer monsoon precipitation (from June to September) contributes 86% of annual precipitation.

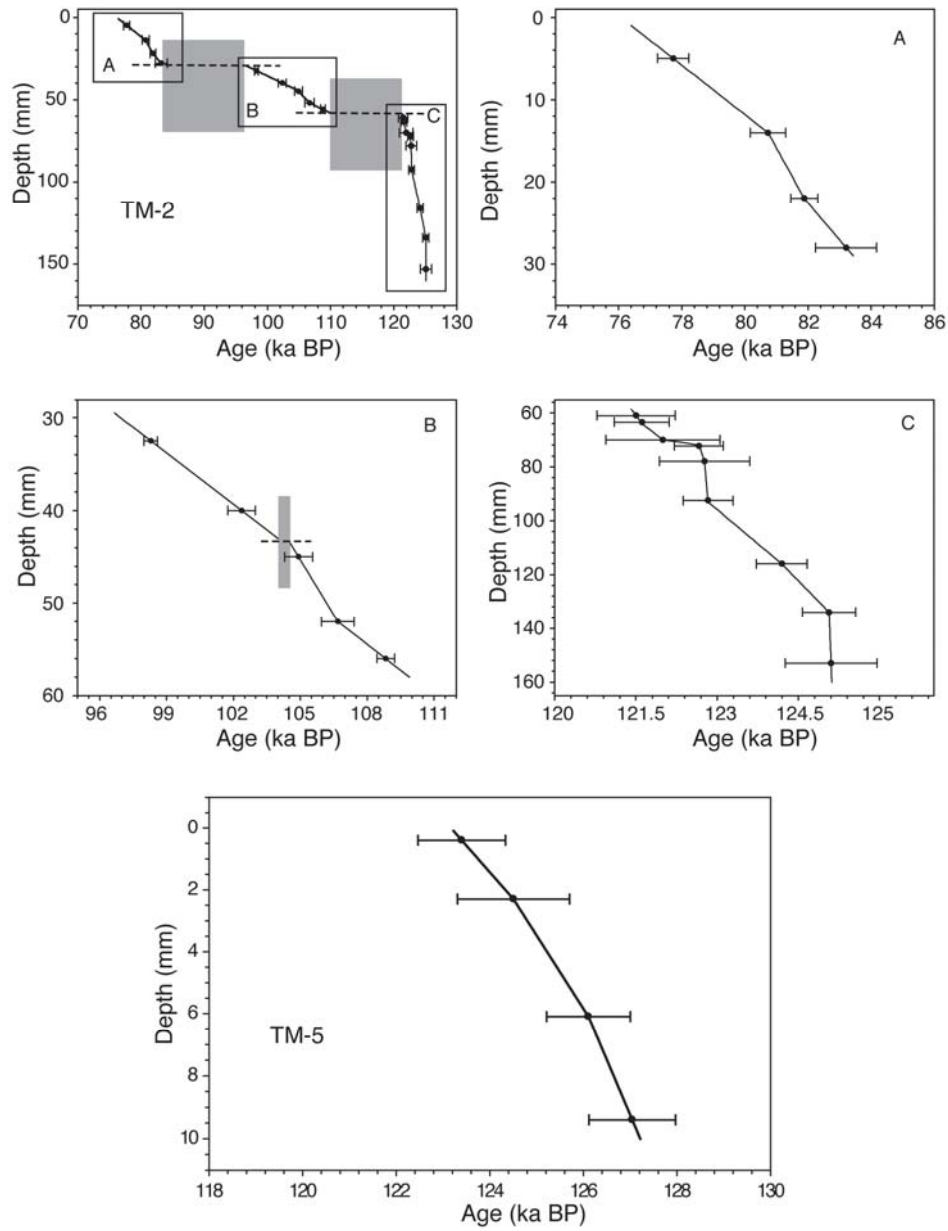

**Figure DR3. Plots of age versus depth for two stalagmites TM-2 and TM-5.** (A), (B) and (C) are the enlarged insets in the plot of TM-2. The chronologies were established by linear interpolations between  $^{230}\text{Th}$  dates. Error bars indicate  $2\sigma$   $^{230}\text{Th}$  dating errors. Note the three main growth phases (which correspond to times of high summer insolation) separated by two large hiatuses in TM-2 (grey bar, which correspond to times of low summer insolation). In inset B, also shown is a short hiatus in the middle growth phase which correlates to the stadial period between Greenland and Chinese Interstadials 23 and 24.

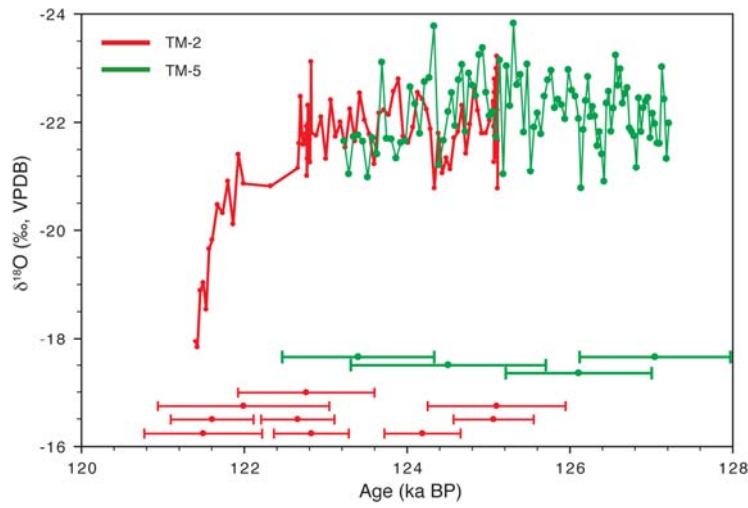

**Figure DR4. Comparison between the  $\delta^{18}\text{O}$  time series of TM-2 and TM-5 during the contemporaneously growing period between 123.2 and 125.2 ka BP.** The  $^{230}\text{Th}$  dates with errors are also depicted at the bottom. The similarity between two speleothem records within the quoted errors show a robust replication (Cheng et al., 2006; Hendy and Wilson, 1968; Wang et al., 2008), indicating that these speleothems were most likely formed under an equilibrium precipitation condition.

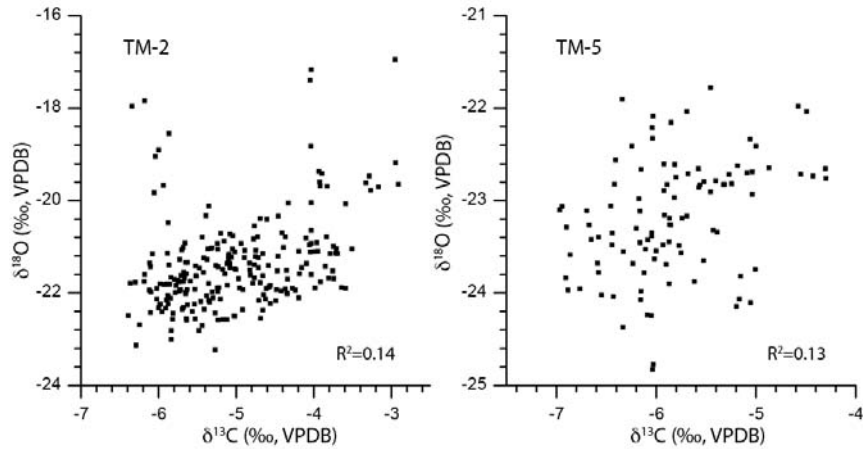

**Figure DR5. The plot of  $\delta^{13}\text{C}$  versus  $\delta^{18}\text{O}$  of stalagmite TM-2 and TM-5.** The low correlations ( $R^2=0.14, 0.13$ ) between  $\delta^{13}\text{C}$  and  $\delta^{18}\text{O}$  indicate that carbon and oxygen are not highly correlated. It suggests that the speleothem most likely grew under isotopic equilibrium conditions (Hendy, 1968).

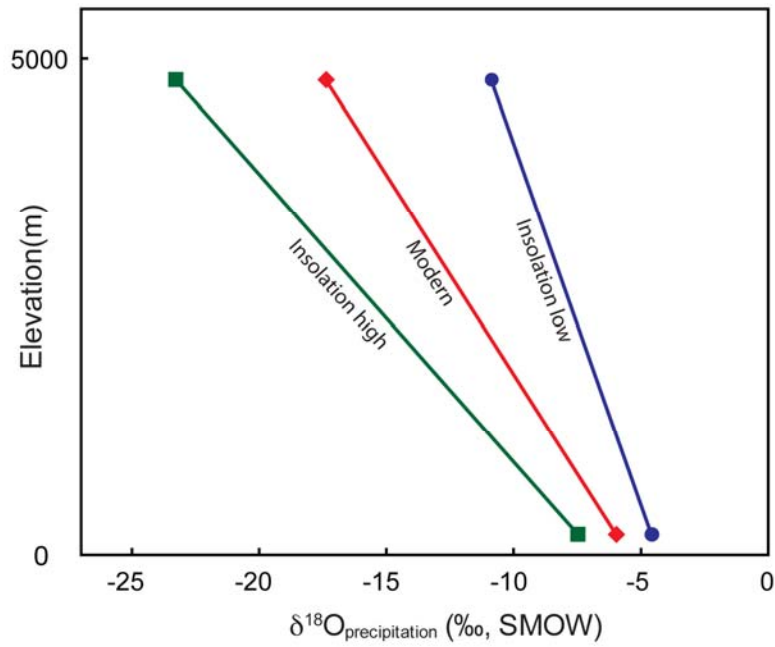

**Figure DR6. Conceptual plot of elevation vs  $\delta^{18}\text{O}_{\text{precipitation}}$  at different insolation times.** The calculated  $\delta^{18}\text{O}_{\text{precipitation}}$  (O'Neil et al., 1969) show a increased lapse rate during the period of high insolation and vice versa, assuming the orbital-scale Indian monsoon variation are similar to the monsoon changes in East Asia. Table DR1 presents the known (black) and calculated (blue) mean values with the presumed conditions (red) at low and high elevation during the different times in the figure.

## Methods

The stalagmite samples were cut into halves along the growth axis with diamond saw and the surface polished. Sub-samples for  $^{230}\text{Th}$  dating were drilled along growth axes at Institute of Earth Environment, Chinese Academy of Sciences. The chemical procedures were similar to those described in Edwards et al. (1987) and accomplished in the clean lab of Minnesota Isotope Laboratory. The measurements were run on an inductively coupled plasma mass spectrometer (Thermo-Finnigan ELEMENT) using procedures described in Cheng et al. (2000) and Shen et al. (2002). A total of 22  $^{230}\text{Th}$  dates were obtained with typical errors in age ( $2\sigma$ ) of less than 1%. Linear interpolations between  $^{230}\text{Th}$  dates were used to establish chronologies for stalagmites TM-2 and TM-5.

Sub-samples for stable isotope analysis were drilled directly from the polished section of the stalagmites. Approximately 100  $\mu\text{g}$  of powder samples were drilled along growth axes of stalagmites and analyzed with an on-line, automated carbonate preparation system (Kiel III), linked to a Finnigan MAT-252 gas source mass spectrometer at the Isotope Laboratory at Institute of Earth Environment, Chinese Academy of Sciences. NBS19 and Laboratory standard TTB1 were run every 10 to 12 samples and arbitrary selected duplicates were run every 10 to 20 samples. Results show that the precision of  $\delta^{18}\text{O}$  analysis is better than 0.12‰ ( $2\sigma$ ). The sub-sampling interval is, 1mm for stalagmite TM-5 and TM-2 (59 to 174mm away from the top), and 0.5mm for TM-2 (0 to 59mm away from the top) along the growth axis.

## Supplementary Tables

**Table DR1. The known (black) and calculated (blue) mean values with the presumed conditions (red) at low and high elevation during the different times in the figure.**

|                 | Low Elevation (New Delhi, India,<br>~200m above sea level.) |                                                            |                          | High Elevation (Bange County, China,<br>~4800m above sea level) |                                                            |                          |
|-----------------|-------------------------------------------------------------|------------------------------------------------------------|--------------------------|-----------------------------------------------------------------|------------------------------------------------------------|--------------------------|
|                 | $\delta^{18}\text{O}_{\text{calcite}}$<br>/ ‰, VPDB         | $\delta^{18}\text{O}_{\text{precipitation}}$<br>/ ‰, VSMOW | Temperature<br>/ Celsius | $\delta^{18}\text{O}_{\text{calcite}}$<br>/ ‰, VPDB             | $\delta^{18}\text{O}_{\text{precipitation}}$<br>/ ‰, VSMOW | Temperature<br>/ Celsius |
| High Insolation | -10.8                                                       | -7.5                                                       | 28                       | -22.0                                                           | -23.3                                                      | 9                        |
| Modern          | -8.8                                                        | -6.0                                                       | 25                       | -14.3                                                           | -17.4                                                      | 1                        |
| Low Insolation  | -6.8                                                        | -4.6                                                       | 22                       | -6.6*                                                           | -10.9**                                                    | -4                       |

\*This is a hypothetical value as we would not expect actual calcite deposition at -4 degrees.

\*\*This value is calculated from the -6.6 per mil value estimated for the calcite, using the standard water/calcite fractionation equation extrapolated to negative temperatures.

**Table DR2.**  $^{230}\text{Th}$  dating results. The error is  $2\sigma$ .

| Sample ID | Distan /mm | $^{238}\text{U}$ ppb | $^{232}\text{Th}$ ppt | $\delta^{234}\text{U}$ measured <sup>a</sup> | $[\text{}^{230}\text{Th}/\text{}^{238}\text{U}]$ activity <sup>c</sup> | $[\text{}^{230}\text{Th}/\text{}^{232}\text{Th}]$ atomic $\times 10^{-6}$ <sup>d</sup> | Age uncorrected    | Age corrected <sup>e</sup> | $\delta^{234}\text{U}_{\text{initial}}$ corrected <sup>b</sup> | $^{230}\text{Th}$ Age (yr B.P.) <sup>f</sup> |
|-----------|------------|----------------------|-----------------------|----------------------------------------------|------------------------------------------------------------------------|----------------------------------------------------------------------------------------|--------------------|----------------------------|----------------------------------------------------------------|----------------------------------------------|
| TM2-5     | 5          | 355.3 $\pm$ 0.8      | 2886 $\pm$ 8          | 402.1 $\pm$ 2.4                              | 0.7380 $\pm$ 0.0030                                                    | 1497 $\pm$ 7                                                                           | 78,000 $\pm$ 500   | 77,800 $\pm$ 500           | 501.0 $\pm$ 3.1                                                | 77,700 $\pm$ 500                             |
| TM2-14    | 14         | 390.2 $\pm$ 0.5      | 5870 $\pm$ 60         | 408.2 $\pm$ 1.6                              | 0.7619 $\pm$ 0.0033                                                    | 840 $\pm$ 10                                                                           | 81,100 $\pm$ 500   | 80,800 $\pm$ 600           | 512.8 $\pm$ 2.1                                                | 80,700 $\pm$ 600                             |
| TM2-22    | 22         | 351.8 $\pm$ 0.7      | 1189 $\pm$ 7          | 420.2 $\pm$ 2.7                              | 0.7743 $\pm$ 0.0024                                                    | 3780 $\pm$ 20                                                                          | 82,000 $\pm$ 400   | 81,900 $\pm$ 400           | 529.7 $\pm$ 3.4                                                | 81,900 $\pm$ 400                             |
| TM2-28    | 28         | 487.2 $\pm$ 0.6      | 2500 $\pm$ 30         | 415.6 $\pm$ 1.7                              | 0.7811 $\pm$ 0.0062                                                    | 2510 $\pm$ 40                                                                          | 83,000 $\pm$ 1000  | 83,300 $\pm$ 1000          | 525.7 $\pm$ 2.6                                                | 83,200 $\pm$ 1000                            |
| TM2-34    | 34         | 399.1 $\pm$ 0.4      | 1290 $\pm$ 20         | 391.0 $\pm$ 1.4                              | 0.8568 $\pm$ 0.0014                                                    | 4360 $\pm$ 50                                                                          | 98,400 $\pm$ 300   | 98,300 $\pm$ 300           | 516.1 $\pm$ 1.9                                                | 98,300 $\pm$ 300                             |
| TM2-40    | 40         | 333.4 $\pm$ 0.8      | 130 $\pm$ 6           | 392.4 $\pm$ 2.9                              | 0.8794 $\pm$ 0.0027                                                    | 37300 $\pm$ 1700                                                                       | 102,400 $\pm$ 600  | 102,400 $\pm$ 600          | 524.2 $\pm$ 3.9                                                | 102,400 $\pm$ 600                            |
| TM2-45    | 45         | 513.2 $\pm$ 1.2      | 193 $\pm$ 8           | 403.7 $\pm$ 2.8                              | 0.9011 $\pm$ 0.0028                                                    | 39600 $\pm$ 1600                                                                       | 105,000 $\pm$ 600  | 105,000 $\pm$ 600          | 543.1 $\pm$ 3.8                                                | 104,900 $\pm$ 600                            |
| TM2-52    | 52         | 651.3 $\pm$ 1.8      | 341 $\pm$ 6           | 411.9 $\pm$ 3.0                              | 0.9165 $\pm$ 0.0033                                                    | 28900 $\pm$ 500                                                                        | 106,700 $\pm$ 700  | 106,700 $\pm$ 700          | 557.0 $\pm$ 4.2                                                | 106,700 $\pm$ 700                            |
| TM2-54    | 54         | 625.5 $\pm$ 0.7      | 1720 $\pm$ 20         | 415.1 $\pm$ 1.5                              | 0.9310 $\pm$ 0.0018                                                    | 5580 $\pm$ 60                                                                          | 108,900 $\pm$ 400  | 108,900 $\pm$ 400          | 564.4 $\pm$ 2.1                                                | 108,800 $\pm$ 400                            |
| TM2-61    | 61         | 617.0 $\pm$ 1.3      | 457 $\pm$ 7           | 370.9 $\pm$ 2.3                              | 0.9595 $\pm$ 0.0028                                                    | 21400 $\pm$ 300                                                                        | 121,600 $\pm$ 700  | 121,600 $\pm$ 700          | 522.9 $\pm$ 3.4                                                | 121,500 $\pm$ 700                            |
| TM2-64    | 64         | 784.6 $\pm$ 1.0      | 670 $\pm$ 10          | 369.4 $\pm$ 1.5                              | 0.9595 $\pm$ 0.0020                                                    | 18600 $\pm$ 400                                                                        | 121,700 $\pm$ 500  | 121,700 $\pm$ 500          | 520.7 $\pm$ 2.2                                                | 121,600 $\pm$ 500                            |
| TM2-70    | 70         | 680.5 $\pm$ 0.9      | 3530 $\pm$ 40         | 361.0 $\pm$ 1.6                              | 0.9551 $\pm$ 0.0046                                                    | 3040 $\pm$ 40                                                                          | 122,000 $\pm$ 1100 | 122,000 $\pm$ 1000         | 509.4 $\pm$ 2.8                                                | 122,000 $\pm$ 1000                           |
| TM2-72    | 72         | 560.4 $\pm$ 0.6      | 1080 $\pm$ 10         | 361.1 $\pm$ 1.4                              | 0.9579 $\pm$ 0.0017                                                    | 8200 $\pm$ 100                                                                         | 122,800 $\pm$ 500  | 122,700 $\pm$ 500          | 510.5 $\pm$ 2.1                                                | 122,700 $\pm$ 500                            |
| TM2-78    | 78         | 248.1 $\pm$ 0.5      | 723 $\pm$ 8           | 362.0 $\pm$ 2.9                              | 0.9585 $\pm$ 0.0030                                                    | 5430 $\pm$ 60                                                                          | 122,900 $\pm$ 800  | 122,800 $\pm$ 800          | 512.2 $\pm$ 4.2                                                | 122,800 $\pm$ 800                            |
| TM2-93    | 93         | 302.2 $\pm$ 0.3      | 870 $\pm$ 10          | 352.2 $\pm$ 1.6                              | 0.9518 $\pm$ 0.0016                                                    | 5440 $\pm$ 80                                                                          | 122,900 $\pm$ 500  | 122,900 $\pm$ 500          | 498.1 $\pm$ 2.3                                                | 122,800 $\pm$ 500                            |
| TM2-116   | 116        | 354.8 $\pm$ 0.4      | 1280 $\pm$ 20         | 361.4 $\pm$ 1.4                              | 0.9651 $\pm$ 0.0017                                                    | 4410 $\pm$ 50                                                                          | 124,300 $\pm$ 500  | 124,300 $\pm$ 500          | 513.2 $\pm$ 2.1                                                | 124,200 $\pm$ 500                            |
| TM2-134   | 134        | 345.4 $\pm$ 0.4      | 160 $\pm$ 10          | 361.8 $\pm$ 1.6                              | 0.9690 $\pm$ 0.0017                                                    | 34000 $\pm$ 2000                                                                       | 125,100 $\pm$ 500  | 125,100 $\pm$ 500          | 514.9 $\pm$ 2.4                                                | 125,100 $\pm$ 500                            |
| TM2-153   | 153        | 376.3 $\pm$ 0.7      | 766 $\pm$ 3           | 358.2 $\pm$ 2.0                              | 0.9670 $\pm$ 0.0034                                                    | 7830 $\pm$ 40                                                                          | 125,200 $\pm$ 900  | 125,200 $\pm$ 900          | 510.2 $\pm$ 3.0                                                | 125,100 $\pm$ 900                            |
| TM5-4     | 4          | 164.3 $\pm$ 0.3      | 2312 $\pm$ 9          | 323.9 $\pm$ 2.6                              | 0.9325 $\pm$ 0.0034                                                    | 1094 $\pm$ 6                                                                           | 123,800 $\pm$ 900  | 123,500 $\pm$ 900          | 459.1 $\pm$ 3.9                                                | 123,400 $\pm$ 900                            |
| TM5-23    | 23         | 176.0 $\pm$ 0.4      | 2393 $\pm$ 8          | 336.2 $\pm$ 3.3                              | 0.9469 $\pm$ 0.0044                                                    | 1150 $\pm$ 6                                                                           | 124,800 $\pm$ 1200 | 124,600 $\pm$ 1200         | 478.1 $\pm$ 5.0                                                | 124,500 $\pm$ 1200                           |
| TM5-61    | 61         | 269.5 $\pm$ 0.5      | 1214 $\pm$ 7          | 335.9 $\pm$ 3.1                              | 0.9527 $\pm$ 0.0029                                                    | 3490 $\pm$ 20                                                                          | 126,300 $\pm$ 900  | 126,200 $\pm$ 900          | 479.7 $\pm$ 4.6                                                | 126,100 $\pm$ 900                            |
| TM5-94    | 94         | 445.4 $\pm$ 1.0      | 1691 $\pm$ 5          | 331.0 $\pm$ 2.1                              | 0.9539 $\pm$ 0.0035                                                    | 4140 $\pm$ 20                                                                          | 127,200 $\pm$ 900  | 127,100 $\pm$ 900          | 474.1 $\pm$ 3.3                                                | 127,000 $\pm$ 900                            |

The chemical procedures were similar to those described in ref. S5 and accomplished in the clean lab of Minnesota Isotope Laboratory. The measurements were run on an inductively coupled plasma mass spectrometer (Thermo-Finnigan ELEMENT) using procedures described in ref. S6 and ref. S7. Analytical errors are  $2\sigma$  of the mean. <sup>a</sup> $\delta^{234}\text{U} = ([^{234}\text{U}/^{238}\text{U}]_{\text{activity}} - 1) \times 1000$ . <sup>b</sup> $\delta^{234}\text{U}_{\text{initial}}$  corrected was calculated based on  $^{230}\text{Th}$  age (T), i.e.,  $\delta^{234}\text{U}_{\text{initial}} = \delta^{234}\text{U}_{\text{measured}} \times e^{\lambda_{234} \times T}$ , and T is corrected age. <sup>c</sup> $[\text{}^{230}\text{Th}/\text{}^{238}\text{U}]_{\text{activity}} = 1 - e^{-\lambda_{230}T} + (\delta^{234}\text{U}_{\text{measured}}/1000)[\lambda_{230}/(\lambda_{230} - \lambda_{234})](1 - e^{-(\lambda_{230} - \lambda_{234})T})$ , where T is the age (Kaufman and Broecker, 1965). Decay constants are  $9.1788 \times 10^{-6} \text{ yr}^{-1}$  for  $^{230}\text{Th}$ ,  $2.8263 \times 10^{-6} \text{ yr}^{-1}$  for  $^{234}\text{U}$  (Cheng et al., 2000), and  $1.55125 \times 10^{-10} \text{ yr}^{-1}$  for  $^{238}\text{U}$  (Jaffey et al., 1971). <sup>d</sup> The degree of detrital  $^{230}\text{Th}$  contamination is indicated by the  $[\text{}^{230}\text{Th}/\text{}^{232}\text{Th}]$  atomic ratio instead of the activity ratio. <sup>e</sup> Age corrections were calculated using an average crustal  $^{230}\text{Th}/\text{}^{232}\text{Th}$  atomic ratio of  $4.4 \times 10^{-6} \pm 2.2 \times 10^{-6}$ . Those are the values for a material at secular equilibrium, with the crustal  $^{232}\text{Th}/\text{}^{238}\text{U}$  value of 3.8. The errors are arbitrarily assumed to be 50%. <sup>f</sup>B.P. stands for “Before Present” where the “Present” is defined as the year 1950 A.D.

## References

- Cheng, H., Edwards, R.L., Hoff, J., Gallup, C.D., Richards, D.A., and Asmerom, Y., 2000, The half-lives of uranium-234 and thorium-230. *Chemical Geology*, v. 169, p. 17-33.
- Cheng, H., Edwards, R.L., Wang, Y., Kong, X., Ming, Y., Kelly, M.J., Wang, X., Gallup, C.D., and Liu, W., 2006, A penultimate glacial monsoon record from Hulu Cave and two-phase glacial terminations. *Geology*, v. 34, p. 217-220.
- Edwards, R.L., Chen, J.H., and Wasserburg, G.J., 1987, U-238, U-234, Th-230, Th-232 systematics and the precise measurement of time over the past 500,000 years. *Earth Planetary Science Letters*, v. 81, p. 175-192.
- Hendy, C.H., and Wilson, A.T., 1968, Palaeoclimatic data from speleothem. *Nature*, v. 219, p. 48-51.
- Jaffey, A.H.K., Flynn, F., Glendenin, L.E., Bentley, W.C., and Essling, A.M., 1971. Precision measurement of half-lives and specific activities of <sup>235</sup>U and <sup>238</sup>U. *Physics Reviews*, v. C 4, p. 1889–1906.
- Kaufman, A., and Broecker, W.S., 1965. Comparison of <sup>230</sup>Th and <sup>14</sup>C ages for carbonate materials from Lakes Lahontan and Bonneville. *Journal of Geophysical Research*, v. 70, p. 4039–4054.
- O'Neil, J.R., Clayton, R.N., and Mayeda, T.K. Oxygen isotope fractionation in divalent metal carbonates. *Journal of Chemical Physics*, v. 51, 5547-5558 (1969).
- Shen, C.C., Edwards, R.L., Cheng, H., Dorale, J.A., Thomas, R.B., Bradley Moran, S., Weinstein, S.E., and Edmonds, H.N., 2002, Uranium and thorium isotopic and concentration measurements by magnetic sector inductively coupled plasma mass spectrometry. *Chemical Geology*, v. 185, p. 165-178.
- Wang, Y.J., Cheng, H., Edwards, R.L., Kong, X., Shao, X., Chen, S., Wu, J., Jiang, X., Wang, X., and An, Z., 2008, Millennial- and orbital-scale changes in the East Asian monsoon over the past 224,000 years. *Nature*, v. 451, p. 1090-1093.
